# Supplementary material for: The rare sugar d-allose acts as a triggering molecule of rice defence via ROS generation
Source: PubMed Central journal article supplement (PMC3830479; doi:10.1093/jxb/ert282), 2013-09-07

## Supplemental Figures and Tables

**Figs. S1-S9**

**Tables S1-S3**

RESEARCH PAPER:

### **Rare sugar D-allose acts as a triggering molecule of rice defense via ROS generation**

Akihito Kano<sup>1</sup>, Takeshi Fukumoto<sup>1</sup>, Kouhei Ohtani<sup>1</sup>, Akihide Yoshihara<sup>1</sup>, Toshiaki Ohara<sup>2</sup>, Shigeyuki Tajima<sup>1</sup>, Ken Izumori<sup>1</sup>, Keiji Tanaka<sup>2</sup>, Takeo Ohkouchi<sup>2</sup>, Yutaka Ishida<sup>3</sup>, Yoko Nishizawa<sup>4</sup>, Kazuya Ichimura<sup>1</sup>, Yasuomi Tada<sup>1</sup>, Kenji Gomi<sup>1</sup> and Kazuya Akimitsu<sup>1,\*</sup>

<sup>1</sup>Faculty of Agriculture, Rare Sugar Research Center, and Gene Research Center, Kagawa University, Miki, Kagawa 761-0795, Japan; <sup>2</sup>Mitsui Chemicals Agro Inc., Yasu, Shiga 520-2342, Japan; <sup>3</sup>Shikoku Research Institute Inc., Yashima-nishi, Takamatsu 761-0192, Japan; and <sup>4</sup>National Institute of Agrobiological Sciences, Tsukuba 305-8602, Japan.

\*To whom correspondence should be addressed: E-mail: kazuya@ag.kagawa-u.ac.jp  
+81-87-891-3131 (Tel); +81-87-891-3021 (Fax)

## Supplemental figure and table legends

### Figure and table legends

#### **Fig. S1. Fisher projections of various monosaccharide structures used in this study.**

Four common sugars (D-glucose, D-fructose, D-galactose, and D-mannose), nine rare sugars, and their derivatives (D-glucose 6-phosphate, D-allose 6-phosphate, 6-deoxy D-allose) are shown.

#### **Fig. S2. Effect of D-allose concentration on *Xoo* growth in liquid culture.**

Mean OD600 ( $\pm$  SE) of cultures amended with various D-allose concentrations at selected times during three independent experiments. (E)-2-Hexenal served as the control possessing antimicrobial activity (Gomi et al., 2010).

#### **Fig. S3. *OsrbohC* overexpression in rice.**

(A) Construct of *OsrbohC* overexpression vector in pBI333-EN4.

(B) Second generation of lines 11 and 28, selected from multiple transgenic rice plants expressing *OsrbohC*, and WT. No visible phenotype resulted with *OsrbohC* overexpression.

(C) Excess *OsrbohC* did not change sensitivity to *Xoo* with or without 50 mM D-glucose (D-Glc).

#### **Fig. S4. Metabolic pathway of D-allose in *Escherichia coli*.**

Metabolic pathway of D-allose in *E. coli* described by Kim et al. (1997) was shown.

#### **Fig. S5. *E. coli* D-allose kinase (AlsK) overexpression in rice.**

(A) Construct of AlsK overexpression vector in pBI333-EN4.

(B) Second generation of independent lines 6 and 21, selected from multiple transgenic rice plants expressing AlsK, and WT. No visible phenotype resulted with AlsK

overexpression.

(C) Excess AlsK did not change sensitivity to *Xoo* with or without 50 mM D-glucose (D-Glc).

(D-E) D-Glucose (D) or D-glucose 6-phosphate (G6P) (E) content in leaves from WT and AlsK-overexpressing lines, relative ( $\pm$  SE,  $n = 3$ ) to WT, as assessed by HPLC,

(F-K) HPLC detection of ABEE-labeled monosaccharides in extracts from leaves from 24-h D-allose treatment. Each panel on right shows expanded detail of left panel from 1 to 25 min. Absolute value of D-glucose in leaves in panel D was calculated as 2.545  $\mu\text{g}\cdot\text{gFW}^{-1}$ . Abbreviations used: D-allose, D-All; D-allose 6-phosphate, A6P; D-glucose, D-Glc; and D-glucose 6-phosphate, G6P.

**Fig. S6. *E. coli* D-allose 6-phosphate isomerase (AlsI) overexpression in rice.**

(A) Construct of AlsI overexpression vector in pBI333-EN4.

(B) Second generation of independent lines 13 and 14 selected from multiple transgenic rice plants expressing AlsI and WT. No visible phenotype resulted with AlsI overexpression .

(C-H) HPLC detection of ABEE-labeled monosaccharides in extracts from leaves treated with D-allose for 24 h. Each panel on right shows expanded detail of left panel from 1 to 25 min.

Abbreviations used: D-allose, D-All; D-allose 6-phosphate, A6P; D-glucose, D-Glc; and D-glucose 6-phosphate, G6P.

**Fig. S7. Characterization of rice *G6PDHs*.**

(A) qRT-PCR analysis of *OsG6PDH2-5* gene (accession nos. are in panel B) expression in leaves at 0 to 24 h after treatment with 5 mM D-allose (D-All) or

D-glucose (D-Glc), relative to control (no sugar) (Con) ( $\pm$  SE,  $n = 4$ ).

(B) Phylogenetic analysis of *OsG6PDH1*–5 genes with Arabidopsis *G6PD* genes using Clustal W at the DDBJ (<http://www.ddbj.nig.ac.jp/>) and 1,000 bootstraps. Respective clades were categorized according to those for Arabidopsis *G6PD* genes (Wakao et al., 2005).

(C) Subcellular localization of GFP-tagged OsG6PDH1 and OsG6PDH2 in plant cells. Epidermal layers of tobacco leaves were bombarded with particles coated with constructs to express GFP alone (upper), OsG6PDH1-GFP (middle), and OsG6PDH2-GFP (lower).

**Fig. S8. Characterization of *Tos17* mutants for *OsG6PDH1* and its complementation.**

(A) Exon and intron organization of *OsG6PDH1* and various *Tos17* insertion sites. Solid boxes and lines indicate exons and introns; triangles indicate position of *Tos17* insertion. Of 10 lines with *Tos17*-inserted *OsG6PDH1* mutations at the protein-coding region of exon 10 and 11 found in the rice *Tos17* mutant database (Fig. S8A) (Miyao et al., 2003), lines NC0350 and NC0573 have morphologically abnormal phenotypes, and the insertion of *Tos17* did not match the sites recorded for lines NC0293, NC0320, NC0395, and NC0555. For lines NC0322, NC0695, and NC2550 examined by PCR for *Tos17* insertion, no insertion was found at the target site in exon 10 of *OsG6PDH1* (data not shown). Among mutant lines, *Tos17* was inserted at the target site in exon 11 in NC8489, which we then examined further.

(B) Construct of *OsG6PDH1* complementation vector in pBI333-EN4 consists of a 4099-bp DNA fragment with *OsG6PDH1* promoter region (2496 bp) connected to entire cDNA (1551 bp) of *OsG6PDH1* gene with 42-bp 3'-untranslated region by 10-bp

linker.

**Fig. S9. Schematic model of D-allose signal transduction for induction of rice resistance to *Xoo*.** Conversion of D-allose to A6P by HXK induces ROS generation by OsrbohC following PR-gene expression, lesion mimic formation, and resistance to *Xoo* with involvement of G6PDH1 in rice.

**Table S1. Primers used in this study.**

F, forward direction; R, reverse direction. Extra nucleotides attached to introduce restriction sites are underlined.

**Table S2. Enzymatic profiles for OsG6PDH1- and OsG6PDH2-recombinant proteins using NADP+ as a kinetic parameter.**

Kinetic parameters were determined using G6PDH-coupled assay for G6P (Wakao and Benning, 2005).

**Table S3. Property summary for OsG6PDH1- and OsG6PDH2-recombinant proteins.**

<sup>a</sup>Kinetic parameters were determined using G6PDH-coupled assay for A6P with a maximum concentration of 5 mM (Wakao and Benning, 2005). ND: not detected.

<sup>b</sup>G6PDH activity with G6P with 10 mM DTT.

**Experimental Procedures for supplemental results**

*Antimicrobial activity analysis*

*Xoo* was cultured in YT (0.5% (w/v) Bacto-Yeast Extract (Becton, Dickinson & Co.), 1% (w/v) Bacto-Tryptone (Becton, Dickinson & Co.), pH 6.8) liquid medium

containing 1, 5 or 10 mM of D-allose or 100  $\mu$  M (E)-2-hexenal. (E)-2-Hexenal was dissolved in DMSO and used as the control possessing antimicrobial activity by the method previously described (Gomi *et al.*, 2010).

#### *Transient localization assay*

G6PDH1- or G6PDH2-GFP fusion proteins were expressed using a particle gun-mediated DNA delivery to tobacco epidermal cells and imaged using epifluorescence system DP70-SET-A, differential interference contrast optics and an Olympus BX51 microscope (Olympus, Tokyo, Japan). After bombardment, tissues were incubated for 24 h at 24°C in the dark; ca. 100 cells/construct were examined for GFP localization in at least three independent experiments. All methods are as described by Yamasaki and Akimitsu (2007).

#### *Phylogenetic tree analysis*

Phylogenetic tree was constructed using both rice (*OsG6PDH*) and Arabidopsis (*G6PD*) (Wakao *et al.*, 2008) sequences were used for Clustal W (Thompson *et al.*, 1994) analyses at the DNA Data Bank of Japan (<http://www.ddbj.nig.ac.jp/>) using 1,000 bootstraps. Consensus tree was visualized in TREEVIEW (Page, 1996).

#### *Genotypic determination of homozygote for Tos17 insertion*

Total DNA from leaves of WT and *Tos17* mutant lines were isolated using NucleoSpin plant II (MACHEREY-NAGEL, Hoerd, France) and manufacturer's instructions. PCR was run using KOD DNA polymerase (TOYOBO, Osaka, Japan) in a thermal cycler with initial PCR activation at 94°C for 2 min followed by 30 cycles of 3-step cycling (denaturation at 98°C for 10 sec annealing at 60°C for 30 sec, and extension at 68°C for 1 min) with gene-specific primers used for PCR (Table S1).

### *Recombinant G6PDH assays*

Activity of recombinant rice G6PDHs was measured spectrophotometrically (340 nm) at 25°C by detecting NADP reduction via G6PDH reaction, which is coupled with G6P production, as described by Wakao and Benning (2005) as described in the main text. To determine  $K_i$  NADPH of G6PDH, activity was examined with 0.01 to 0.1 mM NADPH.

### **References specific for supplemental information**

- Page RDM.** 1996. TREEVIEW: An application to display phylogenetic trees on personal computers. *Computer Applications in the Biosciences* **12**, 357-358.
- Thompson JD, Higgins DS, Gibson TJ.** 1994. CLUSTAL W: improving the sensitivity of progressive multiple sequence alignment through sequence weighting, position-specific gap penalties and weight matrix choice. *Nucleic Acids Research* **22**, 4673-4680.
- Yamasaki Y, Akimitsu K.** 2007. *In situ* localization of gene transcriptions for monoterpene synthesis in irregular parenchymic cells surrounding the secretory cavities in rough lemon (*Citrus jambhiri*). *Journal of Plant Physiology* **164**, 1436-1448.

**Table S1. Primers used in this study.**

|                                                | Direction | Primer sequences (5'-3')                     |
|------------------------------------------------|-----------|----------------------------------------------|
| Construction of overexpression vectors         |           |                                              |
| <i>AlsK</i>                                    | F         | <u>GCTCTAGAGC</u> ATGCAAAAACAGCATAACGTC      |
|                                                | R         | GGGGT <u>ACCCCTCAT</u> GGGGCTTTAGCACAGAAC    |
| <i>AlsI</i>                                    | F         | <u>GCTCTAGAGC</u> ATGAAAAAGATTGCATTTGGCTGTG  |
|                                                | R         | GGGGT <u>ACCCCTCA</u> ATTCTCCGCTGCTCTATTG    |
| <i>OsrbohC</i>                                 | F         | <u>GCTCTAGAGC</u> TTGGTGGTGGGCTAGCTG         |
|                                                | R         | GGGGT <u>ACCCCTCTAT</u> GCTTCTCGCCCTTG       |
| <i>Tos17</i> analysis by genome PCR            |           |                                              |
| <i>G6PDH1-F</i>                                | F         | CCTTTCATTCTCAAGGCTGG                         |
| <i>G6PDH1-R</i>                                | R         | CCCGGCAAAAACCAATAGTA                         |
| <i>Tos17-F</i>                                 | F         | ATTGTTAGGTTGCAAGTTAGTTAAGA                   |
| Construction of G6PDH1 complementation vectors |           |                                              |
| <i>OsG6PDH1</i> promoter region                | F         | <u>ACATGCATGCATG</u> TTGGCCGACGGTGAAGTC      |
|                                                | R         | <u>GCTCTAGAGCGAT</u> GAACTGTATGGTCTCTTCCTTTG |
| <i>OsG6PDH1</i> translated region              | F         | <u>GCTCTAGAGC</u> ATGTCAGGAGGATCTGGTGATTG    |
|                                                | R         | <u>GCTCTAGAGCA</u> ACCGGCATCTAGACAGAGC       |
| Transgenic analysis by RT-PCR                  |           |                                              |
| <i>AlsK</i>                                    | F         | ATGCAAAAACAGCATAACGTC                        |
|                                                | R         | GTATAATTGCGGGACTCTAATC                       |
| <i>AlsI</i>                                    | F         | ATGAAAAAGATTGCATTTGGCTGTG                    |
|                                                | R         | GTATAATTGCGGGACTCTAATC                       |
| <i>OsrbohC</i>                                 | F         | GTGATCTTTACCCGCCAATC                         |
|                                                | R         | GTATAATTGCGGGACTCTAATC                       |
| <i>OsG6PDH1</i>                                | F         | ATGTCAGGAGGATCTGGTGATTG                      |
|                                                | R         | CTAGAATTTTGAAAGGGTTGGAG                      |
| <i>Actin</i>                                   | F         | CCTGGAATCCATGAGACCAC                         |
|                                                | R         | ACACCAACAATCCCAAACAGAG                       |
| qRT-PCR analysis                               |           |                                              |
| <i>PBZ1</i>                                    | F         | GTGGTTGTGTTTATGTGCCTTCTATG                   |
|                                                | R         | ACTTGCCTCTCTTTATTACCCATTG                    |
| <i>PR1b</i>                                    | F         | AGTGTCTGATCCACGCCTTC                         |
|                                                | R         | ACCTGAAACAGAAAGAAACAGAGG                     |
| <i>POX22.3</i>                                 | F         | GGATGCGTTCGTTGCTGGAAG                        |
|                                                | R         | CAACACCACCGTACCTATACTTGTG                    |
| $\beta$ -1,3-glucanase                         | F         | ACGAGACGGAGAGGCACTTC                         |
|                                                | R         | TCGATCCCCTTCTCAGAACAATCTTC                   |
| <i>IAI</i>                                     | F         | TGCTGTCATATATCTGTGATCTGTGTG                  |
|                                                | R         | CCTTCACTCAGACAACGGCTTATTG                    |
| <i>Proteinase inhibitor</i>                    | F         | GTGTGTTCTAGCTTGTTCGTATTG                     |
|                                                | R         | CACGCATAACCAACATCAAACCAC                     |
| <i>Lipoxygenase</i>                            | F         | CATCTGTTGGAGTGCTCATC                         |
|                                                | R         | TATACGGTGTCTGTACTTACTAC                      |
| <i>Chitinase</i>                               | F         | ACGGCATCAACCAATCAT                           |
|                                                | R         | GTAGCCTGTGCCGAGCAT                           |
| <i>TLP</i>                                     | F         | GCCCTGTCGTGCACCCT                            |
|                                                | R         | CAGGTAAGCGTCGGGGCA                           |
| <i>OsrbohA</i>                                 | F         | TGCAGCATGTCTTATGCAGTC                        |
|                                                | R         | GCCTTGTGACCTTCCTATGTG                        |
| <i>OsrbohB</i>                                 | F         | ATGGTTCCGACGTAACAAGC                         |
|                                                | R         | ACGTTCCATGGACAAAGAGC                         |
| <i>OsrbohC</i>                                 | F         | CAAGGGCGAGAAGCATAGAG                         |
|                                                | R         | CCAGATGATCCCCAAAATC                          |
| <i>OsrbohD</i>                                 | F         | CAACGACTCGGTTCATTTC                          |
|                                                | R         | TGAAAGAGTTGCTAACCGATGC                       |
| <i>OsG6PDH1</i>                                | F         | CCAATGCAGGCTCTGTCTAG                         |
|                                                | R         | TTCCAAGATCAACCAATTACAG                       |
| <i>OsG6PDH2</i>                                | F         | ATTTTCACGATAACGCCTGAC                        |
|                                                | R         | GTCGAAACATGCACTTTTATTTC                      |
| <i>OsG6PDH3</i>                                | F         | CTTTTGCCATTGCATTCTG                          |
|                                                | R         | GGCCTTGCAACCTAAGCTAAC                        |
| <i>OsG6PDH4</i>                                | F         | TCGATCGGAGTCGCTGTTAC                         |
|                                                | R         | AATTTTCGTCCTGAGCAGTC                         |



|                                   |   |                                            |
|-----------------------------------|---|--------------------------------------------|
| <i>OsG6PDH5</i>                   | F | TGGCCTAATTGCTCCAAATG                       |
|                                   | R | GGAACCATTCTATTTTTGTTGC                     |
| <i>Actin</i>                      | F | GAGTATGATGAGTCGGGTCCAG                     |
|                                   | R | ACACCAACAATCCCAAACAGAG                     |
| Production of recombinant protein |   |                                            |
| <i>OsHXX5</i>                     | F | <u>GCGAGCTCGCATGGCGGCGGTGATCGAG</u>        |
|                                   | R | <u>CCTCGAGGGCTAGTCGATCTCGGCATACTGG</u>     |
| <i>OsHXX6</i>                     | F | <u>CGGAATTCCGATGGCCGCCGCTGTGATC</u>        |
|                                   | R | <u>CCCTCGAGGGCTACTCGACGCTAGCATACTGG</u>    |
| <i>AlsK</i>                       | F | <u>CGGAATTCCGATGCAAAAACAGCATAACGTC</u>     |
|                                   | R | <u>CCCTCGAGGGTCATGGGGCTTTAGCACAGAAC</u>    |
| <i>OsG6PDH1</i>                   | F | <u>CGTCGACGATGTCAGGAGGATCTGGTGATT</u>      |
|                                   | R | <u>CCAAGCTTGGCTAGAATTTTGAAAAGGGTTGGAGG</u> |
| <i>OsG6PDH2</i>                   | F | <u>CGTCGACGATGTCAGGAGGATCTCACCAAG</u>      |
|                                   | R | <u>CCAAGCTTGGCTATGCAAGGGTGGGTGGTATC</u>    |
| Transient localization assay      |   |                                            |
| <i>OsG6PDH1</i>                   | F | <u>GTCGACCGTCGTCGTCTTCTTCTTCC</u>          |
|                                   | R | <u>GTCGACGAATTTGAAAGGGTTGGAGG</u>          |
| <i>OsG6PDH2</i>                   | F | <u>GTCGACATGTCAGGAGGATCTCACCAA</u>         |
|                                   | R | <u>GTCGACAAGGGTGGGTGGTA</u>                |

F, forward direction; R, reverse direction. Extra nucleotides attached to introduce restriction sites are underlined.

**Table S2. Enzymatic profiles for OsG6PDH1- and OsG6PDH2-recombinant proteins using NADP<sup>+</sup> as a kinetic parameter.**

| Enzyme | $k_{cat}$ (s <sup>-1</sup> ) | $K_m$ NADP <sup>+</sup> (M) | $k_{cat}/K_m$<br>NADP <sup>+</sup> (M <sup>-1</sup> s <sup>-1</sup> ) | $K_i$ NADPH (M)         |
|--------|------------------------------|-----------------------------|-----------------------------------------------------------------------|-------------------------|
| G6PDH1 | 3.04                         | 6.49 x 10 <sup>-5</sup>     | 4.68 x 10 <sup>4</sup>                                                | 4.15 x 10 <sup>-5</sup> |
| G6PDH2 | 1.06                         | 4.1 x 10 <sup>-5</sup>      | 2.59 x 10 <sup>4</sup>                                                | 3 x 10 <sup>-5</sup>    |

Kinetic parameters were determined using G6PDH-coupled assay for G6P (Wakao and Benning, 2005).

**Table S3. Property summary for OsG6PDH1- and OsG6PDH2-recombinant proteins.**

| Enzyme | A6P <sup>a</sup> | Reduction <sup>b</sup> | Group     |
|--------|------------------|------------------------|-----------|
| G6PDH1 | ND               | Insensitive            | Cytosolic |
| G6PDH2 | ND               | Insensitive            | Cytosolic |

<sup>a</sup>Kinetic parameters were determined using G6PDH-coupled assay for A6P with a maximum concentration of 5 mM (Wakao and Benning, 2005). ND: not detected.

<sup>b</sup>G6PDH activity with G6P with 10 mM DTT.



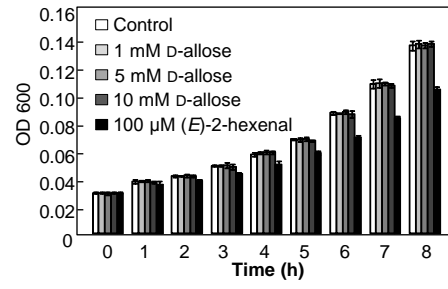

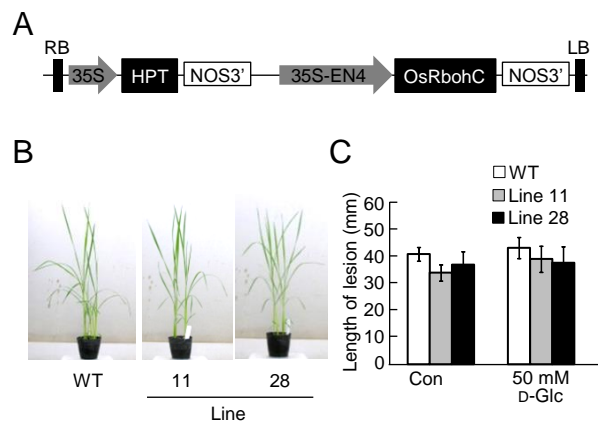

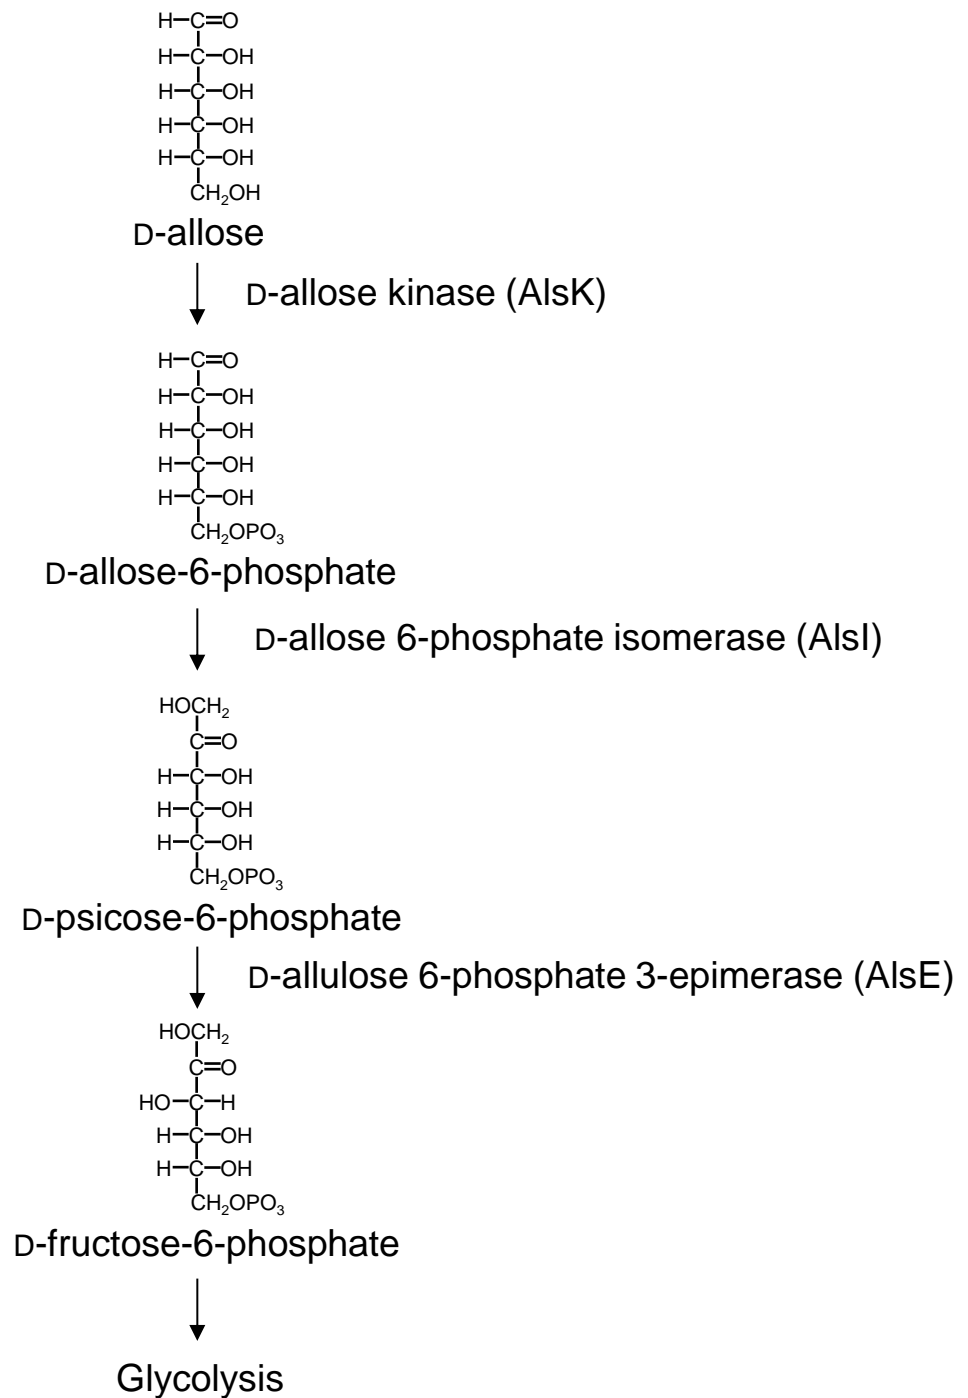

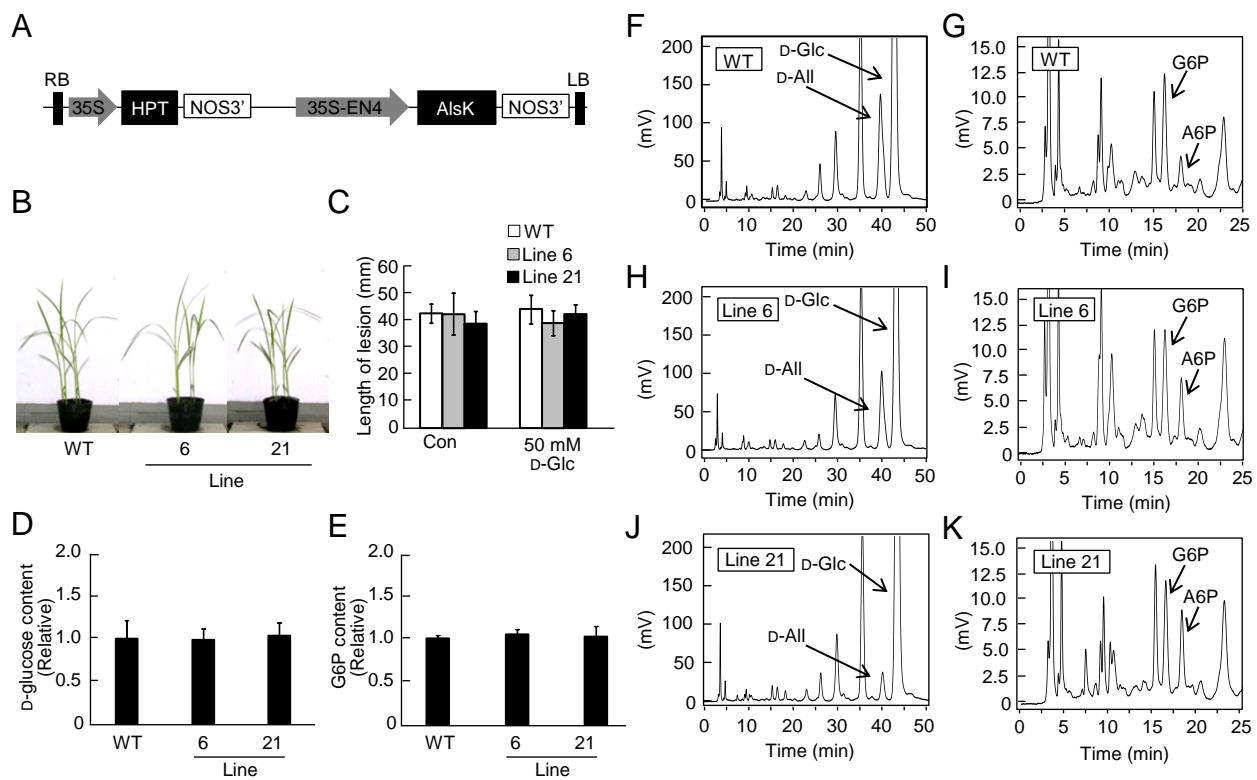

A

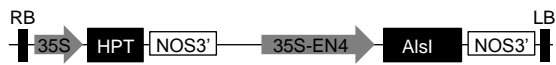

B

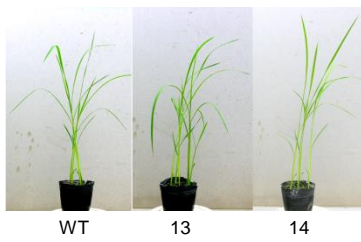

C

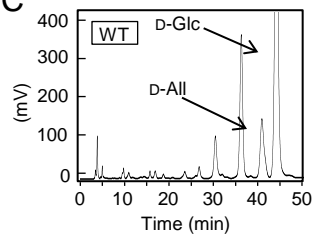

D

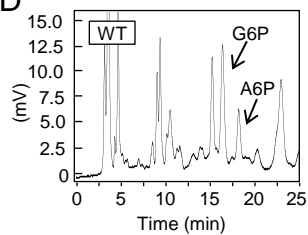

E

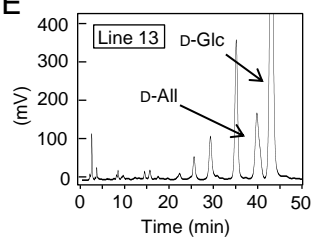

F

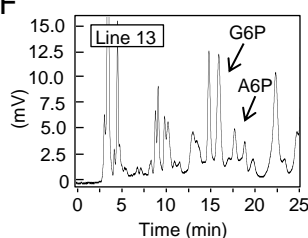

G

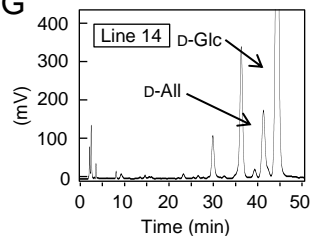

H

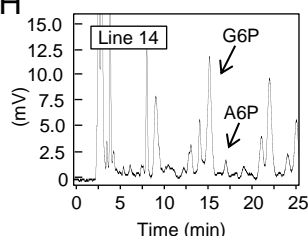

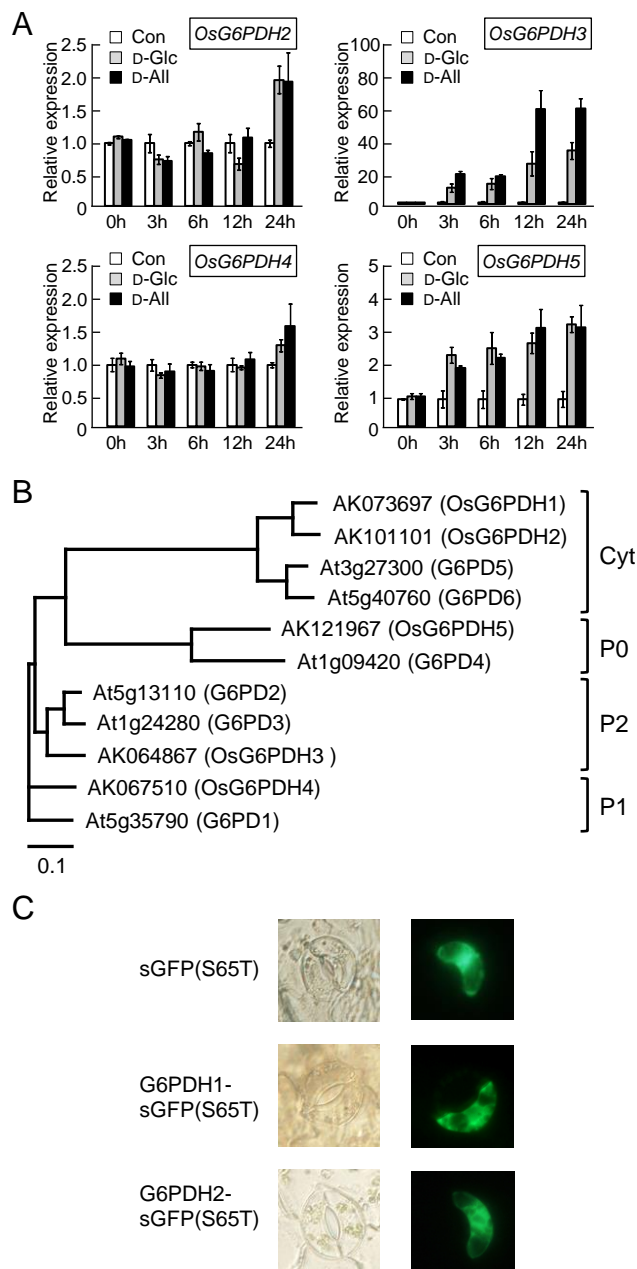



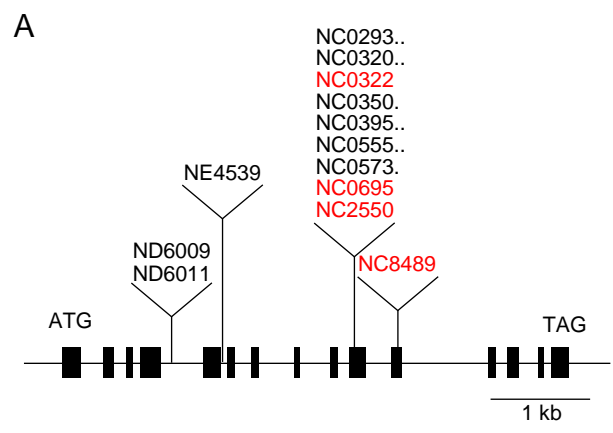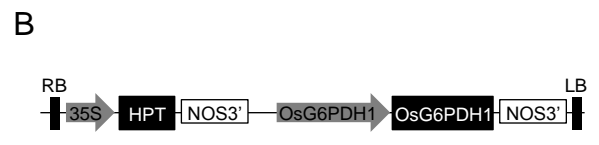

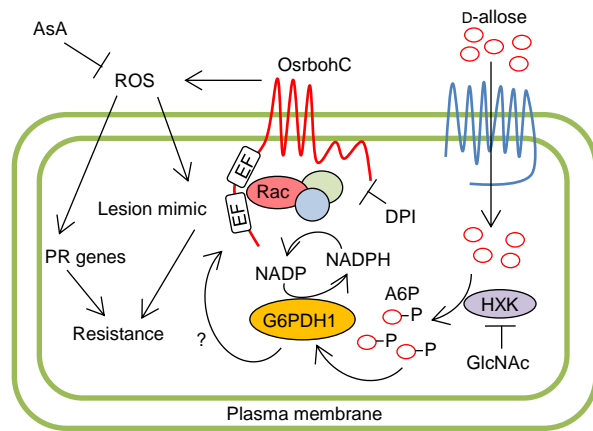

Supplement: supp_ert282_jexbot102319_file001.pdf [file supp_ert282_jexbot102319_file001.pdf]
